# Supplementary material for: JMJD3 deficiency disturbs dopamine biosynthesis in midbrain and aggravates chronic inflammatory pain
Source: PubMed Central journal article supplement — Acta Neuropathol Commun. 2024 Dec 23;12:201. doi: 10.1186/s40478-024-01912-x (PMC11664825; doi:10.1186/s40478-024-01912-x), 2024-12-23
Supplement: 40478_2024_1912_MOESM7_ESM.pdf [file 40478_2024_1912_MOESM7_ESM.pdf]

## Supplemental Table S1

### A. Antibody and drug information

| Product Name                          | Catalog No.                          | RIID        |
|---------------------------------------|--------------------------------------|-------------|
| GSK-J4                                | Sigma-Aldrich Cat#SML0701            | /           |
| CFA                                   | Sigma-Aldrich Cat# F5881             | /           |
| TH                                    | Sigma-Aldrich Cat# T1299             | AB_477560   |
| JMJD3                                 | Millipore Cat# 07-1533               | AB_1587219  |
| NURR1                                 | Santa Cruz Biotechnology Cat# sc-990 | AB_2298676  |
| GAPDH                                 | Proteintech Cat# 10494-1-AP          | AB_2263076  |
| H3K27me3                              | Cell Signaling Technology Cat# 9733  | AB_2616029  |
| H3                                    | Cell Signaling Technology Cat# 4499  | AB_10544537 |
| Anti-rabbit Alexa Fluor™ 546          | Thermo Scientific Cat. No. A11035    | AB_2534093  |
| Anti-mice Alexa Fluor™ 488            | Thermo Scientific Cat. No. A11001    | AB_2534069  |
| Anti-rabbit Alexa Fluor™ 488          | Thermo Scientific Cat. No. A11008    | AB_143165   |
| Anti-mice Alexa Fluor™ 555            | Thermo Scientific Cat. No. A21422    | AB_2535844  |
| Anti-IgG (H+L chain) (Rabbit) pAb-HRP | MBL Code No.458                      | /           |
| Anti-IgG (H+L chain)(Mouse) pAb-HRP   | MBL Code No.330                      | /           |
| MES23.5                               | /                                    | CVCL_J351   |

### B. The parameters for multiple reaction monitoring (MRM)

| Compound      | Precursor Ion | Product Ion | Fragmentor (V) | Collision Energy (eV) | Polarity | Quantification or Qual |
|---------------|---------------|-------------|----------------|-----------------------|----------|------------------------|
| Isoproterenol | 212.13        | 195.1       | 76             | 2                     | Pos      | Qual                   |
| Isoproterenol | 212.13        | 107         | 76             | 30                    | Pos      | Quant                  |
| HVA           | 181.05        | 137.1       | 66             | 6                     | Neg      | Quant                  |
| 5-HT          | 177.1         | 160         | 65             | 6                     | Pos      | Quant                  |
| 5-HT          | 177.1         | 115         | 65             | 34                    | Pos      | Qual                   |
| NE            | 174.1         | 156.1       | 118            | 10                    | Neg      | Quant                  |
| NE            | 174.1         | 128.1       | 118            | 18                    | Neg      | Qual                   |
| DA            | 154.09        | 137         | 70             | 6                     | Pos      | Quant                  |
| DA            | 154.09        | 91          | 70             | 26                    | Pos      | Qual                   |

### C. Primers for genotyping and quantitative PCR analysis

| Primer name | Forward               | Reverse              |
|-------------|-----------------------|----------------------|
| TH          | GTCACGTCCCCAAGGTTTCAT | GAGGAGGGTTTTGTACCCC  |
| JMJD3       | CCCAGGCCCTGTGAGTAAAG  | AGAGGCCAACGATTTGAGCA |
| UTX         | CCTCCATTACCATCCGCCTC  | AGAGTCCTGGCATAGGAGCA |
| GAPDH       | TGTGAACGGATTTGGCCGTA  | GTCTCGCTCCTGGAAGATGG |

| Primer name | Forward                | Reverse                |
|-------------|------------------------|------------------------|
| CRE         | TCGATGCAACGAGTGATGAG   | TCCATGAGTGAACGAACCTG   |
| JMJD3 loxP  | GAGACCCCTGTTTGGTTACCAG | GAGGCAGAACCTGAGCAAGACC |

| Primer name | Forward              | Reverse                |
|-------------|----------------------|------------------------|
| th1         | GCGACAGTGGATGCAATTAG | CCTCTTAAAGGCCAGGCTGA   |
| th2         | GGGACTTGAAGACATCCAA  | CCCTAGACACGACATGAAGACA |
| th3         | TAGGGAGATGCCAAAGGCTA | AGTGTATGTGCTGGCACTGG   |

|     |                      |                      |
|-----|----------------------|----------------------|
| th4 | GCTCAGCATAAGTCCCCTGT | GTAAGGGCGCACTCAGTGAT |
|-----|----------------------|----------------------|

| Primer name | Forward              | Reverse                |
|-------------|----------------------|------------------------|
| Nurr1       | GCGGTGGGTCATTGTTC    | GCGCTCCGGTTCATTGTC     |
| Nurr2       | GGCACAGTGGCTTAAAAGT  | CTCCTCTGCAAGTTCCAACC   |
| Nurr3       | TGAATAAGACACGCGTCAGG | AGCCCCACTGTCCTTTCTTT   |
| Nurr4       | CAGTGTCTTAGGGGCCAGAG | GAAGATCAGCTACTCTGCTGGA |
